# Supplementary material for: Aseptic Abscess Syndrome: Clinical Characteristics, Associated Diseases, and up to 30 Years’ Evolution Data on a 71-Patient Series
Source: MDPI journal article supplement (doi:10.3390/jcm11133669), 2022-06-25
Supplement: s1 [file s1]

Table S1. Treatments received by the 71 patients with an aseptic abscess syndrome

|                                |    | Total ( <i>n</i> = 71) |
|--------------------------------|----|------------------------|
| Corticosteroids, <i>n</i> (%)  |    | 61 (85.9)              |
| Colchicine, <i>n</i> (%)       |    | 27 (38.0)              |
| Immunosuppressants             | or |                        |
| immunomodulators, <i>n</i> (%) |    | 44 (61.9)              |
| Azathioprine                   |    | 22 (30.9)              |
| Cyclophosphamide               |    | 8 (11.2)               |
| Methotrexate                   |    | 3 (4.2)                |
| Thalidomide                    |    | 2 (2.8)                |
| Dapsone                        |    | 2 (4.2)                |
| Leflunomide                    |    | 1 (1.4)                |
| Sulfasalazine                  |    | 1 (1.4)                |
| Ciclosporine                   |    | 1 (1.4)                |
| Tacrolimus                     |    | 1 (1.4)                |
| Mycophenolate mofetil          |    | 1 (1.4)                |
| Biologics, <i>n</i> (%)        |    | 23 (32.3)              |
| Infliximab                     |    | 14 (19.7)              |
| Adalimumab                     |    | 8 (11.2)               |
| Anakinra                       |    | 4 (5.6)                |
| Ustekinumab                    |    | 2 (2.8)                |
| Certolizumab                   |    | 1 (1.4)                |
| Canakinumab                    |    | 1 (1.4)                |
| Vedolizumab                    |    | 1 (1.4)                |

Table S2. Location and treatment on diagnosis and on relapse of the 71 patients with an aseptic abscess syndrome

|                                         | Total (n = 71)              |                        |                                          |
|-----------------------------------------|-----------------------------|------------------------|------------------------------------------|
|                                         | On<br>diagnosis<br>(n = 71) | On relapse<br>(n = 44) | On relapse if<br>splenectomy<br>(n = 23) |
| Location of abscesses , n (%)           |                             |                        |                                          |
| Spleen                                  | 48 (67)                     | 15 (34)                | -                                        |
| Lymph nodes                             | 30 (42)                     | 12 (27)                | 7 (30)                                   |
| Skin                                    | 17 (24)                     | 8 (18)                 | 3 (13)                                   |
| Liver                                   | 14 (20)                     | 7 (16)                 | 6 (26)                                   |
| Lung                                    | 10 (14)                     | 6 (14)                 | 4 (17)                                   |
| Muscle                                  | 5 (7)                       | 2 (4)                  | 1 (4)                                    |
| Genitalia (vagina, prostate, testicles) | 3 (4)                       | 2 (4)                  | 0                                        |
| ENT                                     | 3 (4)                       | 2 (4)                  | 1 (4)                                    |
| Kidney                                  | 2 (3)                       | 5 (11)                 | 1 (4)                                    |
| Brain                                   | 0 (0)                       | 4 (9)                  | 4 (17)                                   |
| Pancreas                                | 2 (3)                       | 2 (4)                  | 1 (4)                                    |
| Breast                                  | 1 (1)                       | 1 (2)                  | 0                                        |
| Treatment, n (%)                        |                             |                        |                                          |
| Corticosteroids                         | 57 (80)                     | 42 (95)                | 21 (91)                                  |
| Colchicine                              | 20 (28)                     | 27 (61)                | 10 (43)                                  |
| Immunosuppressants/immunomodulators     | 16 (22)                     | 30 (68)                | 14 (61)                                  |
| Biologics                               | 3 (4)                       | 23 (52)                | 6 (26)                                   |

Table S3. Characteristics of the 71 patients with an aseptic abscess syndrome according to the association or not with an inflammatory bowel disease

|                                                                       | <b>IBD<br/>(n = 30)</b> | <b>No IBD<br/>(n = 41)</b> | <b>p-value</b> |
|-----------------------------------------------------------------------|-------------------------|----------------------------|----------------|
| Age (years), mean±SD                                                  | 26.9±1.77               | 40.1±3.02                  | 0.0004         |
| Female gender, n (%)                                                  | 15 (50.0)               | 19 (46.3)                  | 0.761          |
| Time (months) between 1 <sup>st</sup> symptoms and diagnosis, mean±SD | 12.4±4.79               | 16.1±23.7                  | 0.19           |
| First symptoms, n (%)                                                 |                         |                            |                |
| Fever                                                                 | 27 (90.0)               | 34 (82.9)                  | 0.75           |
| Abdominal pain                                                        | 23 (58.9)               | 23 (79.3)                  | 0.076          |
| Number of organs involved, mean±SD                                    | 2.6±1.8                 | 2.5±1.5                    | 0.88           |
| Main abscess location, n (%)                                          |                         |                            |                |
| Spleen                                                                | 23 (76.6)               | 28 (68.2)                  | 0.43           |
| Lymph node                                                            | 16 (53.3)               | 20 (48.7)                  | 0.70           |
| Skin                                                                  | 10 (33.3)               | 11 (26.8)                  | 0.55           |
| Liver                                                                 | 7 (23.3)                | 13 (31.7)                  | 0.43           |
| Lung                                                                  | 6 (20.0)                | 10 (24.3)                  | 0.66           |
| Associated condition, n (%)                                           |                         |                            |                |
| Pyoderma gangrenosum                                                  | 3 (10.0)                | 7 (17.5)                   | 0.37           |
| Relapsing polychondritis                                              | 0                       | 6 (14.6)                   | 0.02           |
| Spondyloarthritis                                                     | 1 (3.3)                 | 2 (4.8)                    | 0.74           |
| Laboratory abnormalities                                              |                         |                            |                |
| Anemia                                                                | 14 (46.6)               | 15 (36.5)                  | 0.39           |
| Polymorphonuclear neutrophil hyperleukocytosis                        | 27 (90.0)               | 34 (82.9)                  | 0.39           |
| Increased CRP                                                         | 28 (9.3)                | 38 (92.6)                  | 0.91           |
| Liver function test abnormalities                                     | 8 (26.6)                | 10 (24.3)                  | 0.82           |
| Colonoscopy on diagnosis, n (%)                                       | 14 (46.6)               | 16 (40.0)                  | 0.57           |
| Splenectomy, n (%)                                                    | 10 (33.3)               | 13 (31.7)                  | 0.88           |
| Treatment, n (%)                                                      |                         |                            |                |
| Antibiotics                                                           | 24 (80.0)               | 35 (85.0)                  | 0.55           |
| Anti-tuberculosis drugs                                               | 5 (16.6)                | 6 (14.6)                   | 0.81           |
| Corticosteroids                                                       | 23 (76.6)               | 34 (82.9)                  | 0.51           |
| Immunosuppressants on diagnosis                                       | 8 (26.6)                | 8 (19.5)                   | 0.47           |
| Immunosuppressants or immunomodulators                                | 19 (63.3)               | 25 (60.9)                  | 0.84           |
| Biologics                                                             | 7 (23.0)                | 16 (39.0)                  | 0.16           |
| Relapse, n (%)                                                        |                         |                            |                |
| Mean number ± SD                                                      | 1.3                     | 1.6                        | 0.46           |
| Location of relapse vs diagnosis                                      |                         |                            |                |
| In the same organ, n (%)                                              | 13 (43.0)               | 20 (48.7)                  | 0.64           |

CRP, C-reactive protein; IBD, inflammatory bowel disease; PG, pyoderma gangrenosum; RP, relapsing polychondritis; SD, standard deviation; SPA spondyloarthritis.
